# Supplementary material for: Nanoporous and morphology-transforming g-CNNPs for trace-level detection of mefenamic acid in urine samples and in vitro protein denaturation inhibition
Source: Royal Society of Chemistry journal article supplement (doi:10.1039/d4tc04020a), 2024-12-16
Supplement: d4tc04020a1.pdf [file d4tc04020a1.pdf]

## Supporting Information

# Nanoporous and Morphology-transforming g-CNNPs for Trace-level detection of Mefenamic Acid in Urine samples and *in vitro* Protein denaturation inhibition

Anusree S. Gangadharan,<sup>a</sup> Daniel T. Thangadurai,<sup>a\*</sup> Nandhakumar Manjubaashini<sup>b</sup> and Devaraj Nataraj<sup>c</sup>

<sup>a</sup>*Department of Chemistry and Centre for Nanoscience and Technology, KPR Institute of Engineering and Technology, Coimbatore 641407, Tamilnadu, India.*

<sup>b</sup>*National Centre for Nano Science and Technology, University of Madras, Chennai, 600025, Tamilnadu, India.*

<sup>c</sup>*Department of Physics, Bharathiar University, Coimbatore 641046, Tamilnadu, India.*

\*Corresponding author: Tel.: +914222635600; Email: [danielthangadurai.t@kpriet.ac.in](mailto:danielthangadurai.t@kpriet.ac.in)

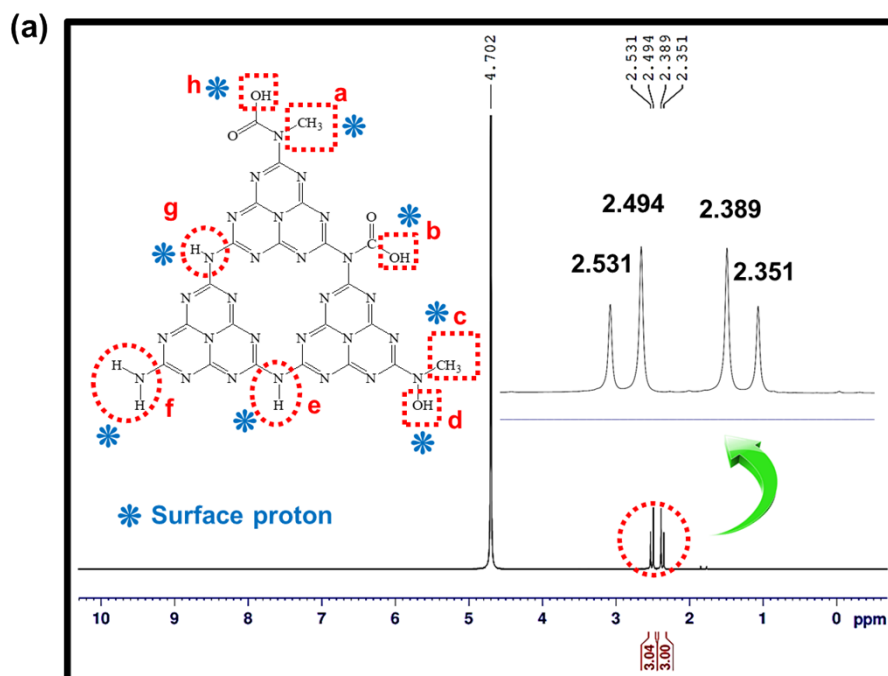

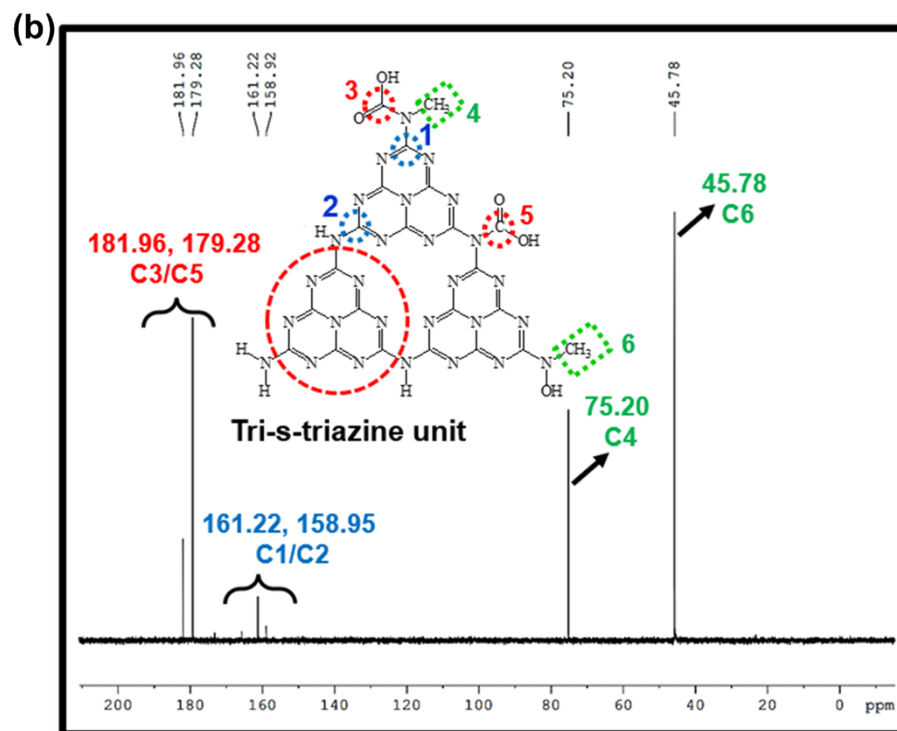

Figure S1. (a)  $^1\text{H}$  NMR , and (b)  $^{13}\text{C}$  NMR spectrum of g-CNNPs.

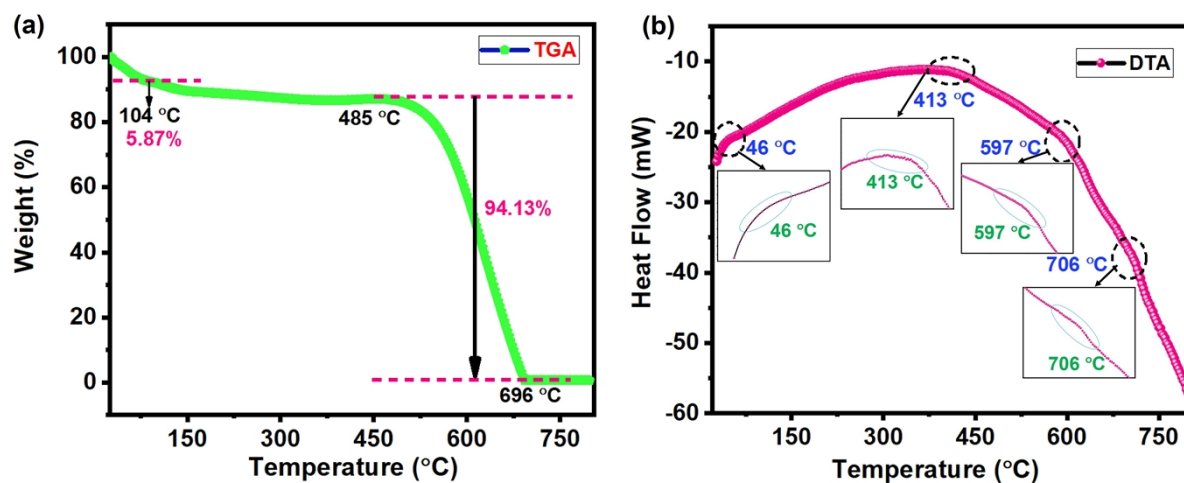

Figure S2. (a) TGA, and (b) DTA analysis of g-CNNPs.

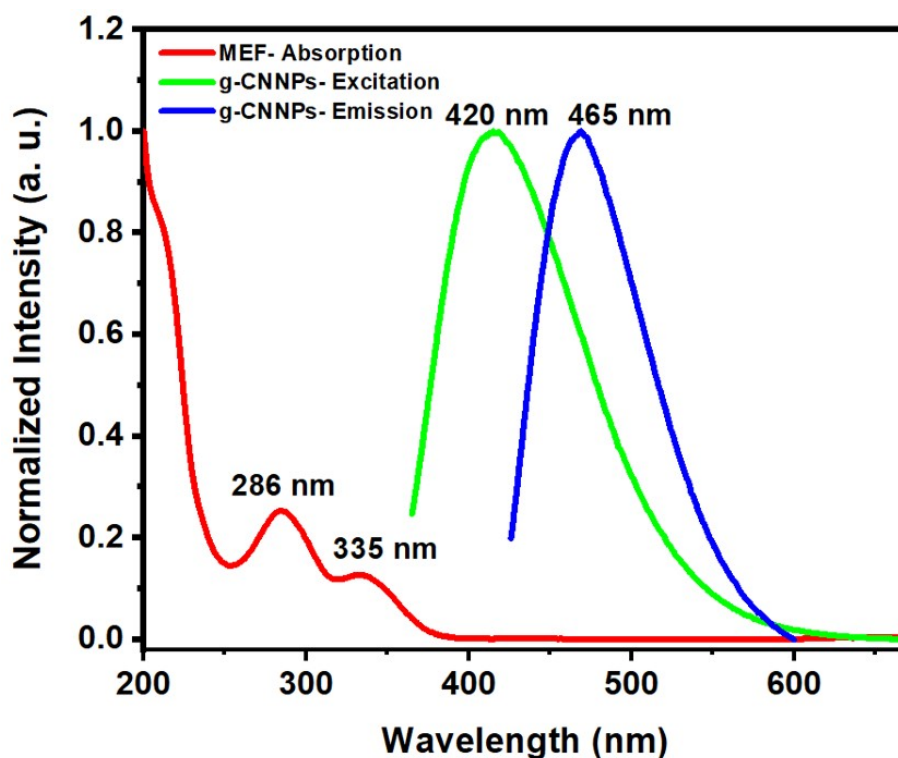

**Figure S3.** Normalized UV-visible absorption spectra of MEF, and PL excitation and emission spectra of g-CNNPs ( $\lambda_{\text{ex}}$ ; 420 nm, slit width; 5 nm).

### Binding constant, LoD, and LoQ calculations

From the fluorescence titration experiments, the binding strength between g-CNNPs and FPN was calculated by using the following equation.

$$\log[F-F_0/F_0] = \log K_a + n\log[Q] \quad (\text{eq.S1})$$

Where “F” is the fluorescence intensity after the addition of FPN and “F<sub>0</sub>” is the initial fluorescence intensity of g-CNNPs. “K<sub>a</sub>” is the binding constant, “n” is the number of binding sites, and “Q” is the concentration of guest, [MEF]. The K<sub>a</sub> and ‘n’ can be estimated from the intercept and slope obtained by plotting  $\log[F-F_0/F_0]$  against  $\log[Q]$ . The fluorescence intensity was measured with the addition of MEF in different concentrations (Q) to the solution of g-CNNPs and they are labeled as ‘F’. From the plot mentioned, the slope

and intercept are calculated. LoD and LoQ are obtained from the slope and intercept (eq. S2 and eq. S3, respectively).

$$\text{LoD} = [3 \times (\text{intercept}/\text{slope})] \quad (\text{eq.S2})$$

$$\text{LoQ} = [10 \times (\text{intercept}/\text{slope})] \quad (\text{eq.S3})$$

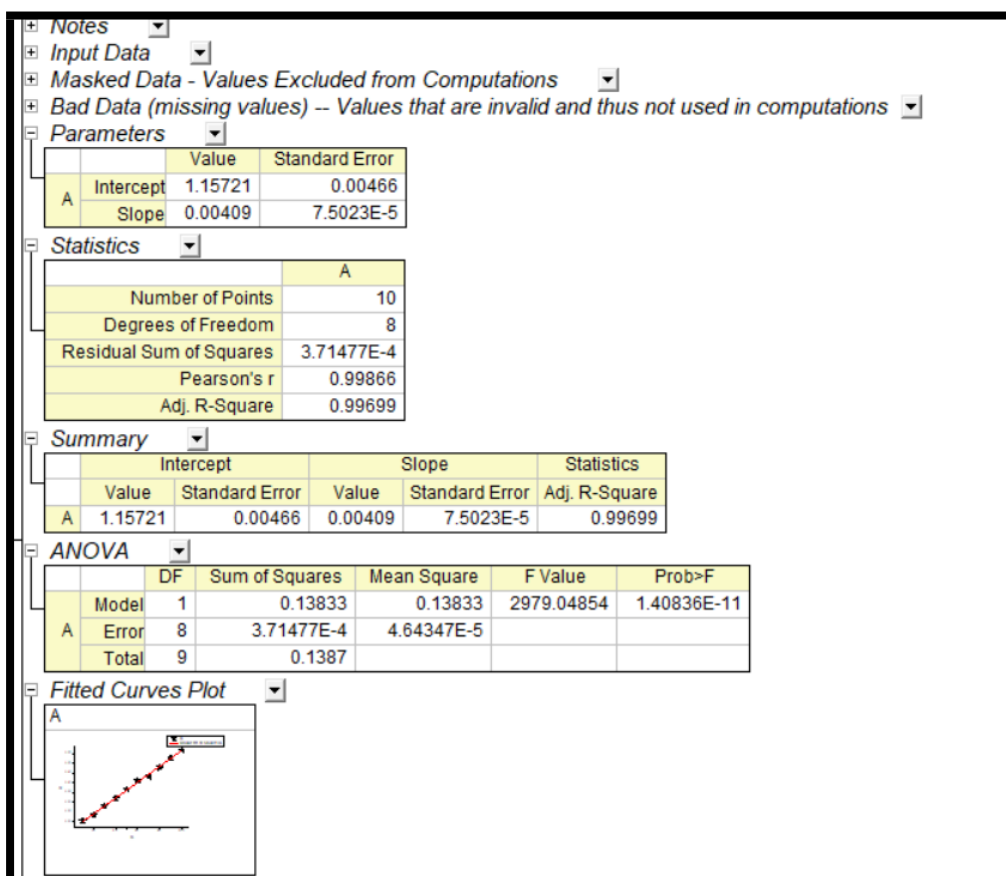

**Figure S4.** Datasheet of fluorescence emission intensity changes of g-CNNPs after the gradual addition of MEF and the limit of detection (LoD) is calculated via linear fit.

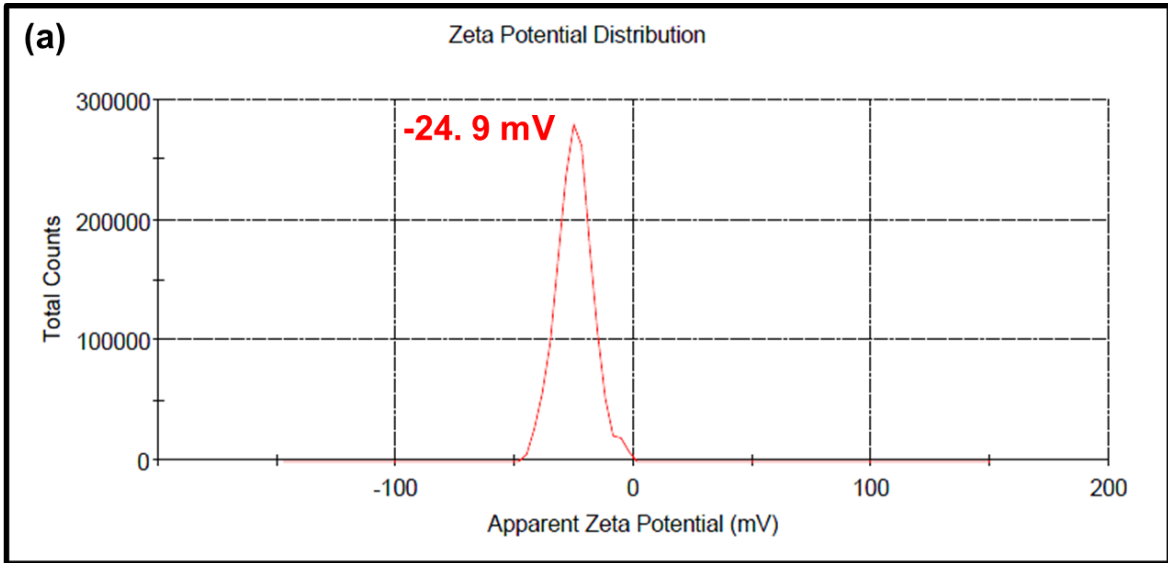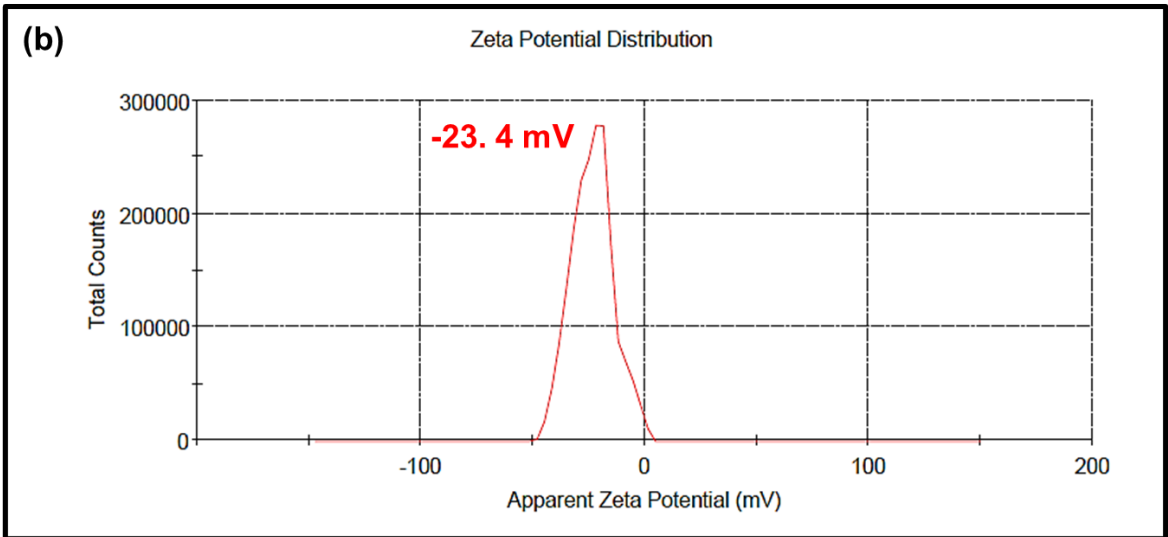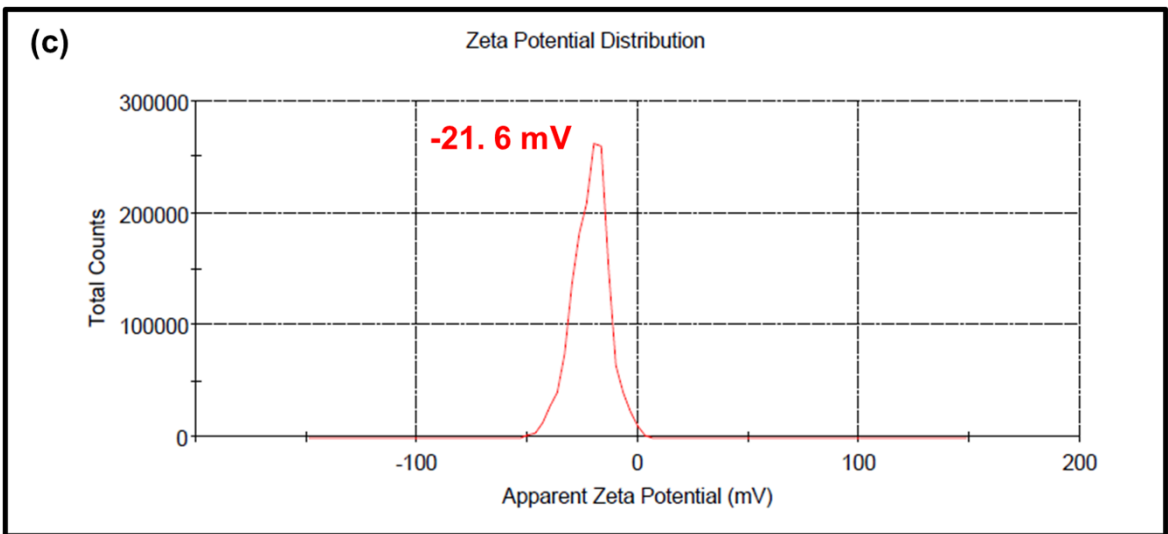

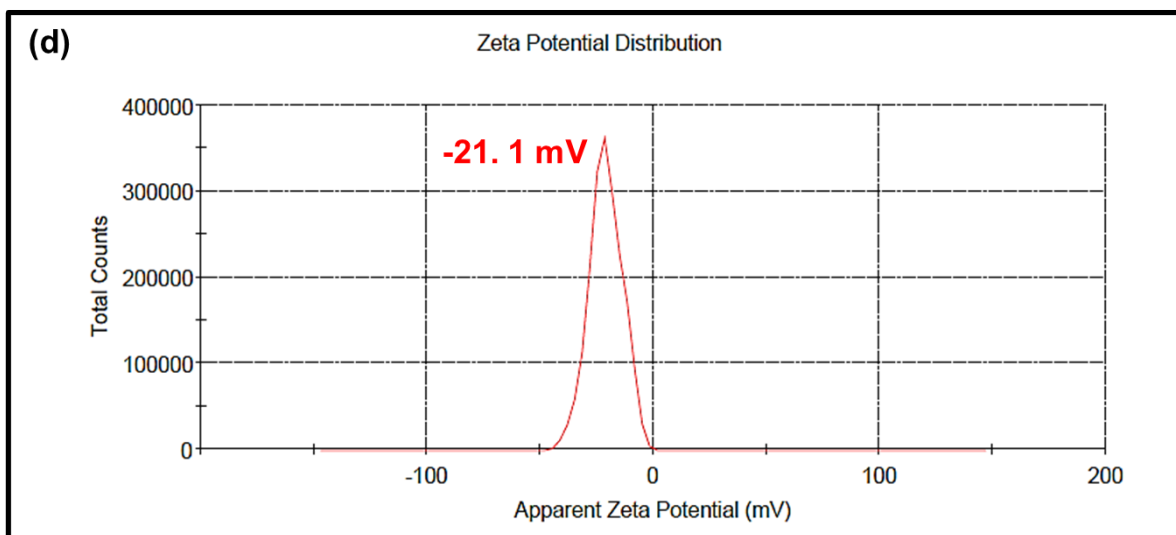

**Figure S5:** Zeta potential measurements of (a) g-CNNPs with the addition of MEF in different concentrations ((b) 0.25; (c) 0.5; and (d) 0.75 eq.).

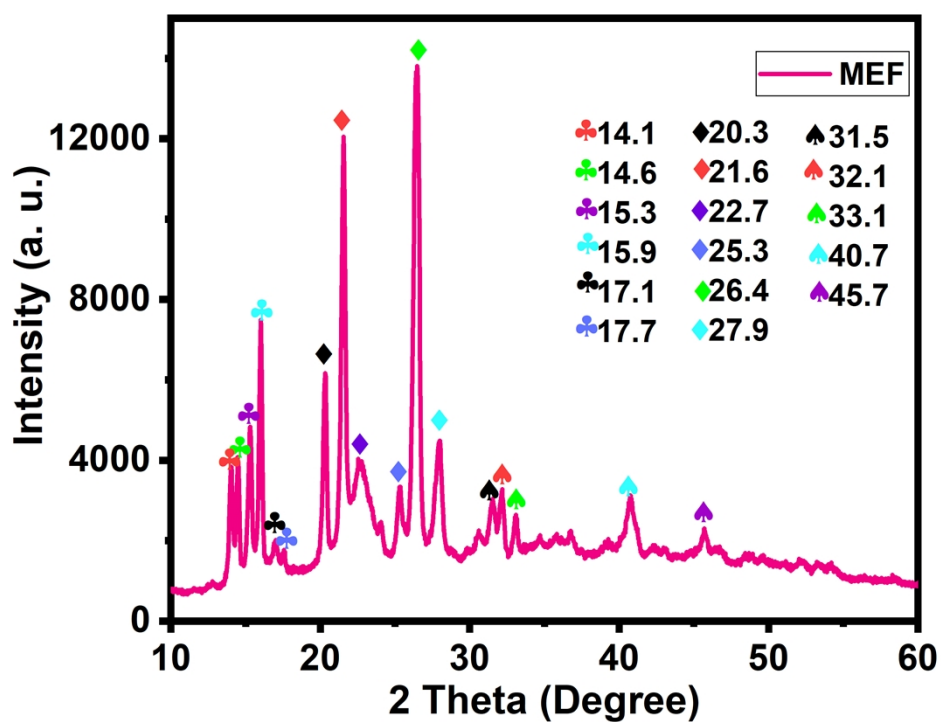

**Figure S6.** XRD pattern of mefenamic acid (MEF).

**Table S1.** The  $2\theta$  ( $\lambda=0.154$  nm), plane, and interplanar distances ( $d_{hkl}$ ) of MEF were obtained from XRD data.

| <b>Sl. No</b> | <b>Peak position (<math>2\theta</math> /degree)</b> | <b>Plane</b> | <b>d (nm)</b> |
|---------------|-----------------------------------------------------|--------------|---------------|
| 1             | 14.1                                                | (010)        | 0.63          |
| 2             | 14.6                                                | (110)        | 0.61          |
| 3             | 15.3                                                | (011)        | 0.58          |
| 4             | 15.9                                                | (101)        | 0.56          |
| 5             | 17.1                                                | (111)        | 0.52          |
| 6             | 17.7                                                | (021)        | 0.50          |
| 7             | 20.3                                                | (120)        | 0.44          |
| 8             | 21.6                                                | (130)        | 0.41          |
| 9             | 22.7                                                | (131)        | 0.39          |
| 10            | 25.3                                                | (040)        | 0.35          |
| 11            | 26.4                                                | (141)        | 0.34          |
| 12            | 27.9                                                | (150)        | 0.32          |
| 13            | 31.5                                                | (002)        | 0.28          |
| 14            | 32.1                                                | (221)        | 0.28          |
| 15            | 33.1                                                | (222)        | 0.27          |
| 16            | 40.7                                                | (240)        | 0.22          |
| 17            | 45.7                                                | (260)        | 0.20          |

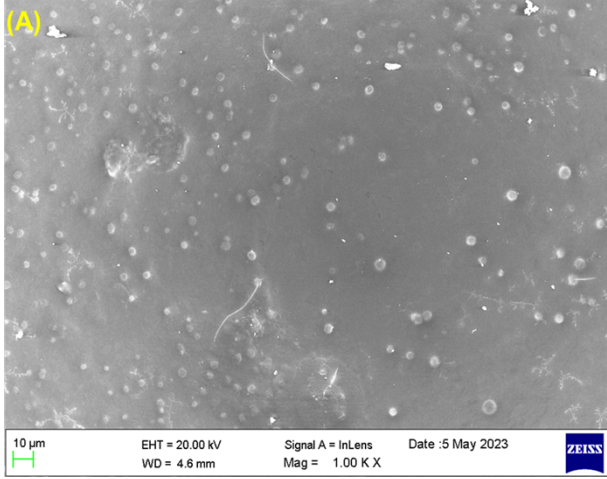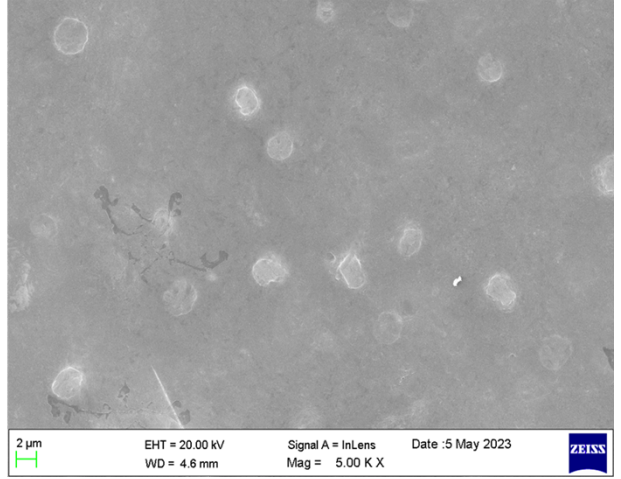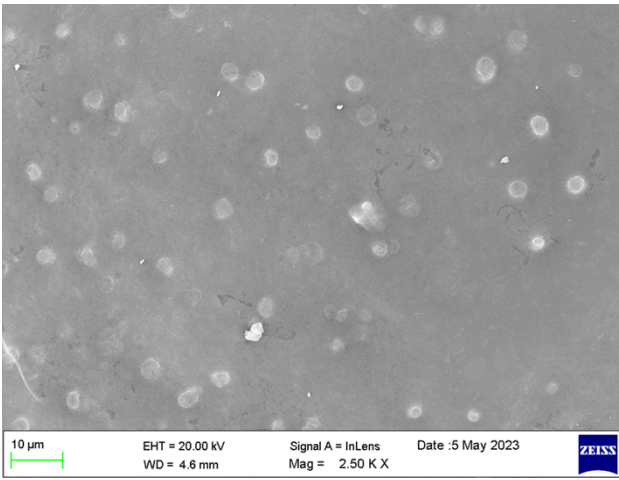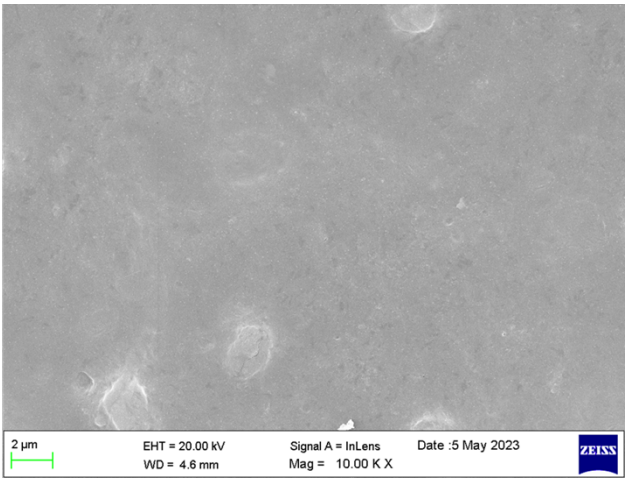



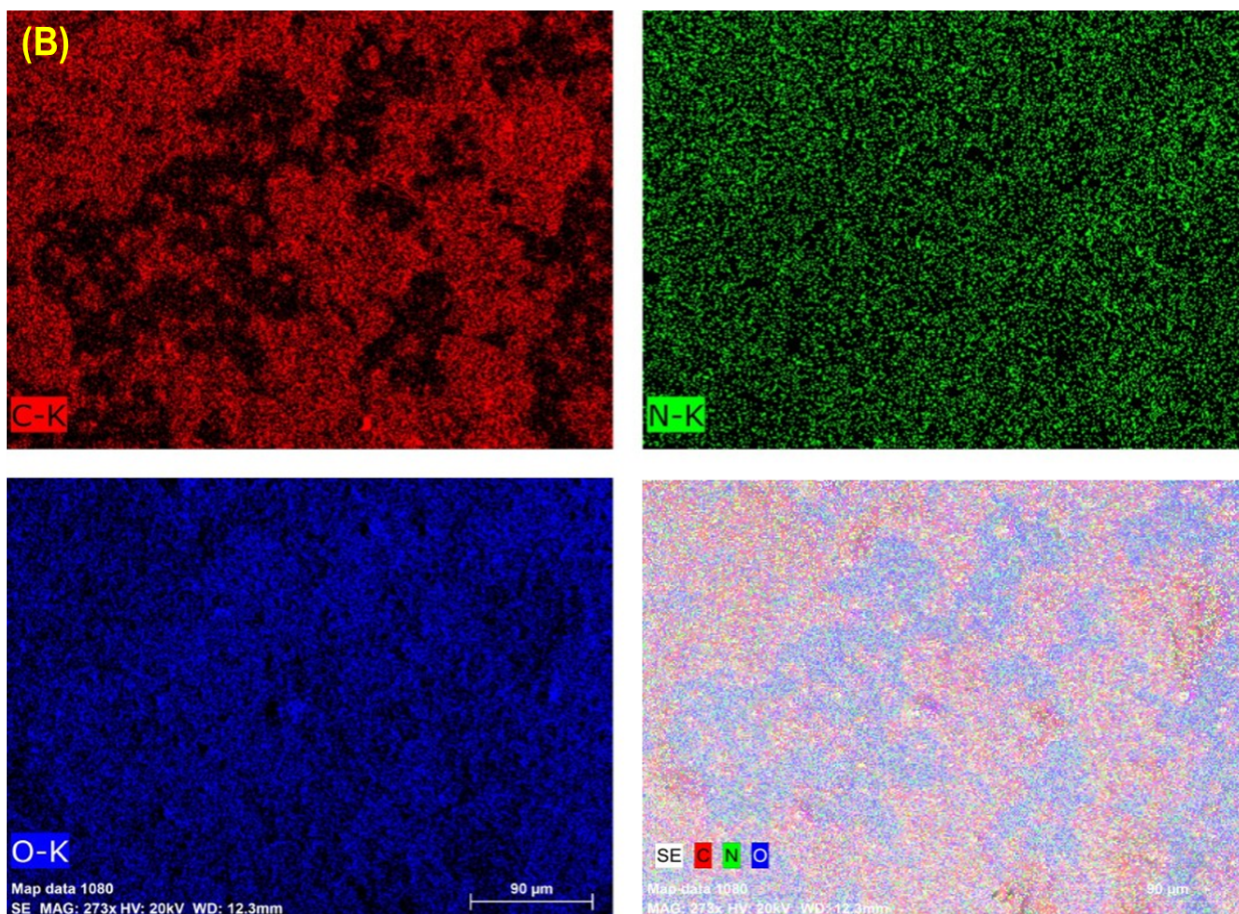

**Figure S7.** (A) FESEM images of g-CNNPs, and (B) Elemental mapping (C, N, O, and all together) of g-CNNPs.

**Table S2.** Percentage composition table of N, O, and C from EDS analysis of g-CNNPs.

| Spectrum: BM 2643 |    |          |                  |                   |                   |                           |
|-------------------|----|----------|------------------|-------------------|-------------------|---------------------------|
| El                | AN | Series   | unn. C<br>[wt.%] | norm. C<br>[wt.%] | Atom. C<br>[at.%] | Error (1 Sigma)<br>[wt.%] |
| O                 | 8  | K-series | 75.30            | 75.30             | 70.03             | 9.35                      |
| C                 | 6  | K-series | 21.14            | 21.14             | 26.19             | 3.24                      |
| N                 | 7  | K-series | 3.56             | 3.56              | 3.78              | 1.01                      |
| Total:            |    |          | 100.00           | 100.00            | 100.00            |                           |

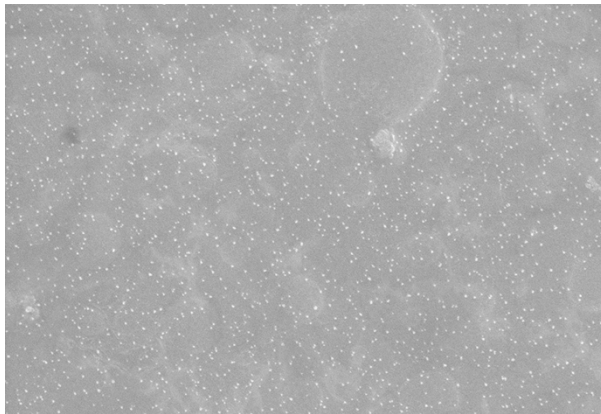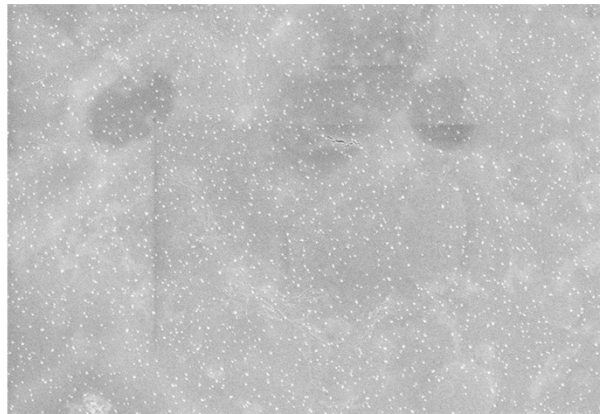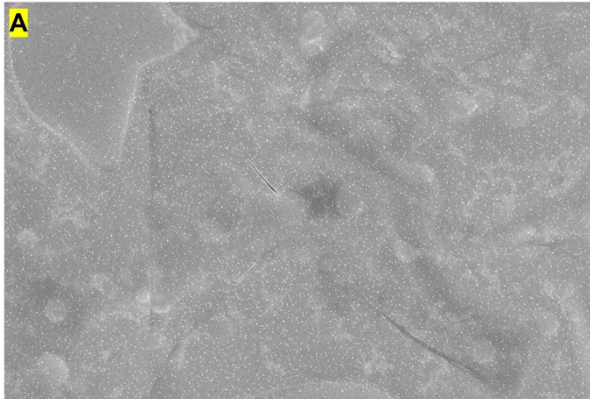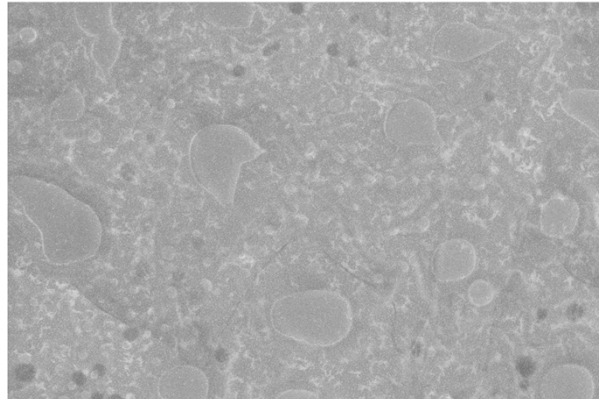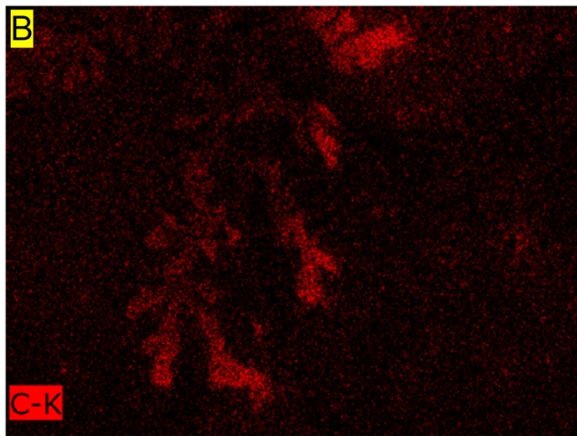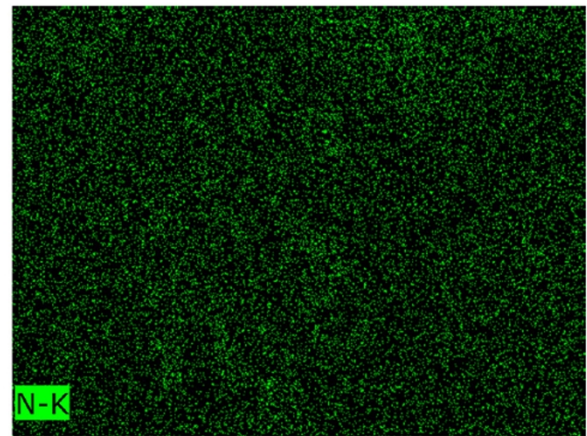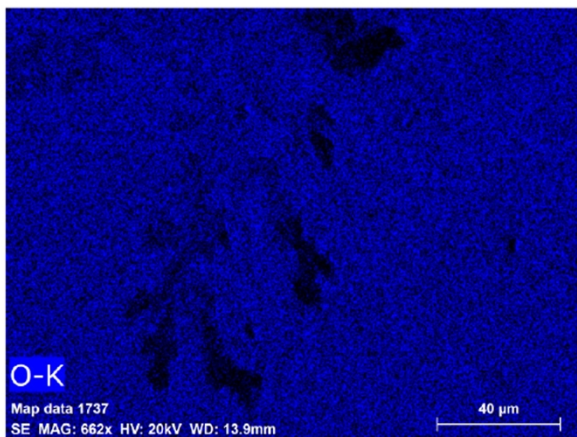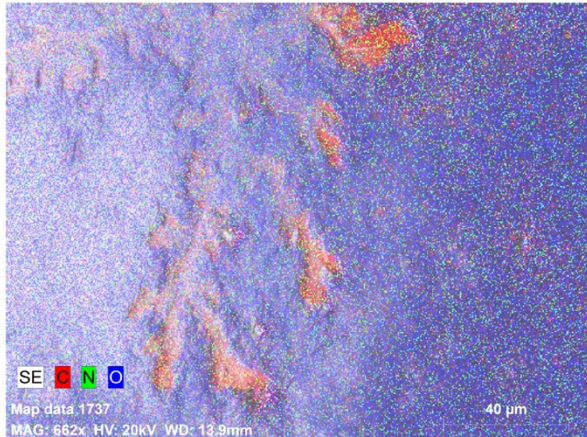

**Figure S8.** (A) FESEM images of g-CNNPs•MEF, and (B) Elemental mapping (C, N, O, and all together) of g-CNNPs•MEF.

**Table S3.** Percentage composition table of N, O, and C from EDS analysis of g-CNNPs•MEF.

Spectrum: BM 4416

| El     | AN | Series   | unn. C [wt.%] | norm. C [wt.%] | Atom. C [at.%] | Error (1 Sigma) [wt.%] |
|--------|----|----------|---------------|----------------|----------------|------------------------|
| O      | 8  | K-series | 70.79         | 70.79          | 64.79          | 8.77                   |
| C      | 6  | K-series | 26.92         | 26.92          | 32.81          | 3.83                   |
| N      | 7  | K-series | 2.29          | 2.29           | 2.39           | 0.76                   |
| Total: |    |          | 100.00        | 100.00         | 100.00         |                        |

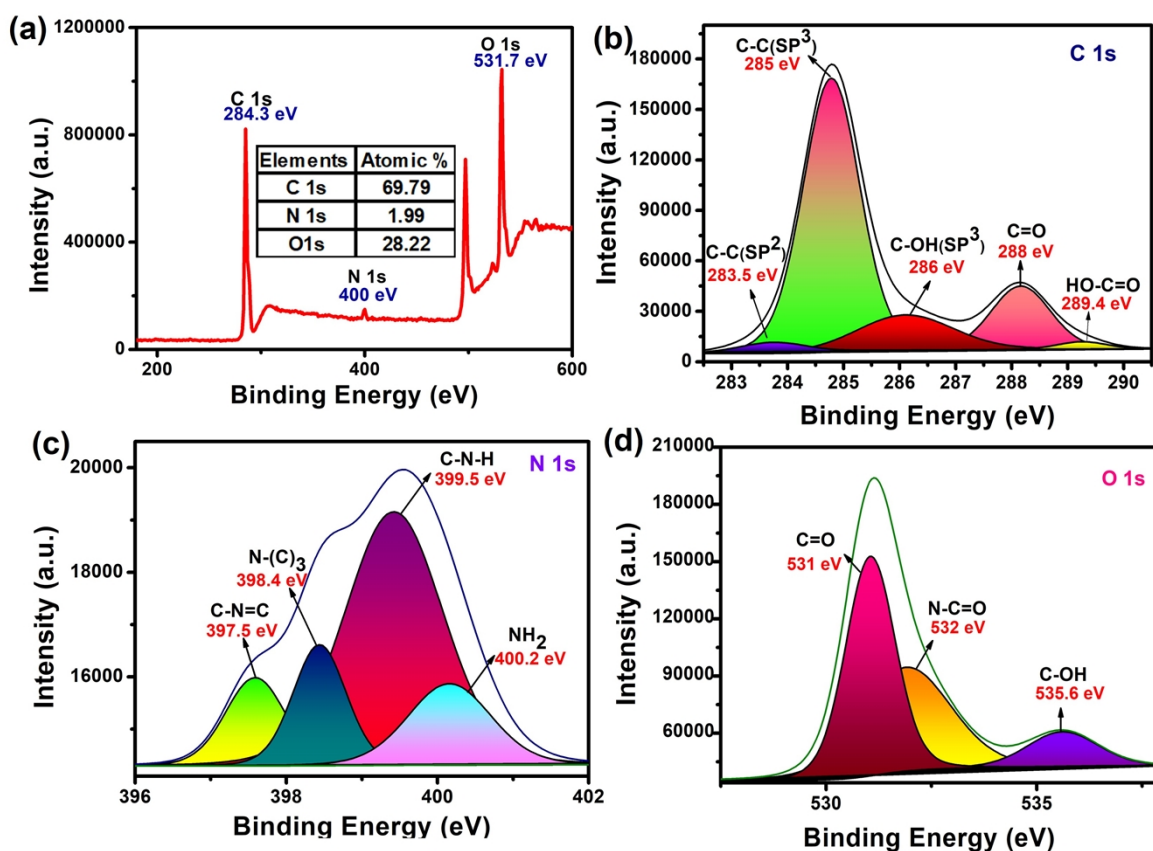

**Figure S9.** (a) XPS survey spectra of g-CNNPs and high-resolution peak fitting spectra of C 1s (b), N 1s (c), and O 1s (d).

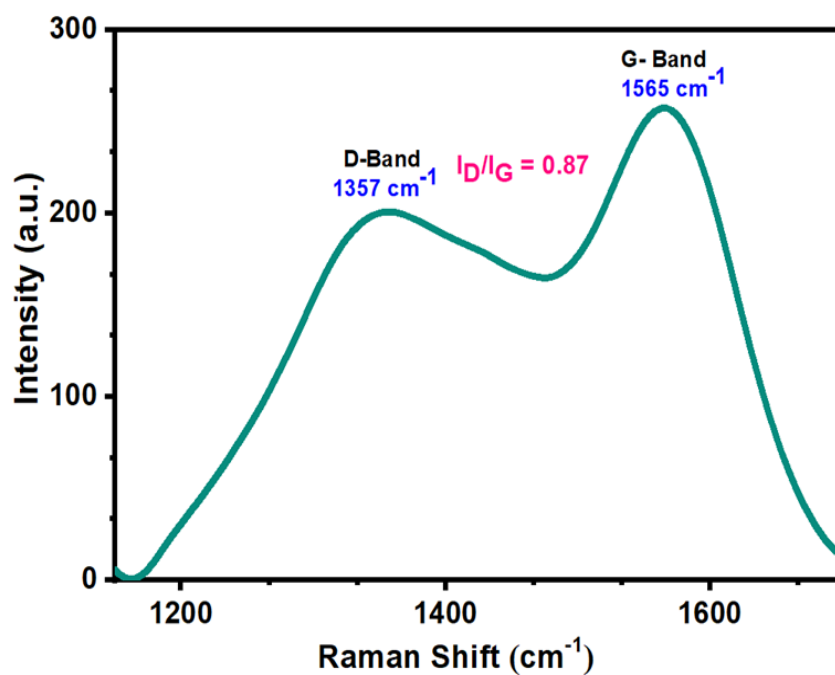

**Figure S10.** Raman spectra of g-CNNPs.

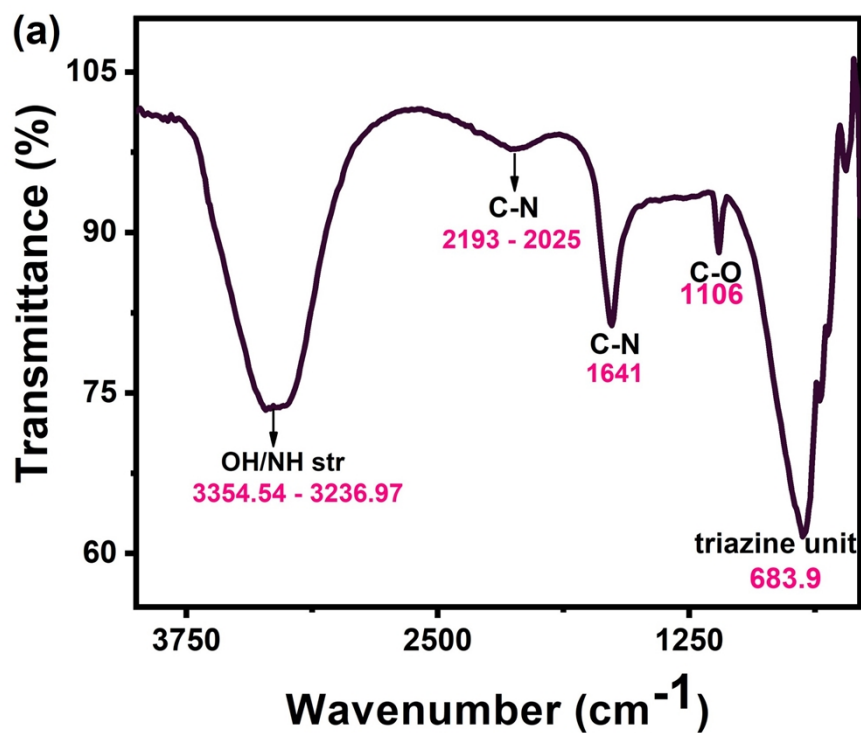

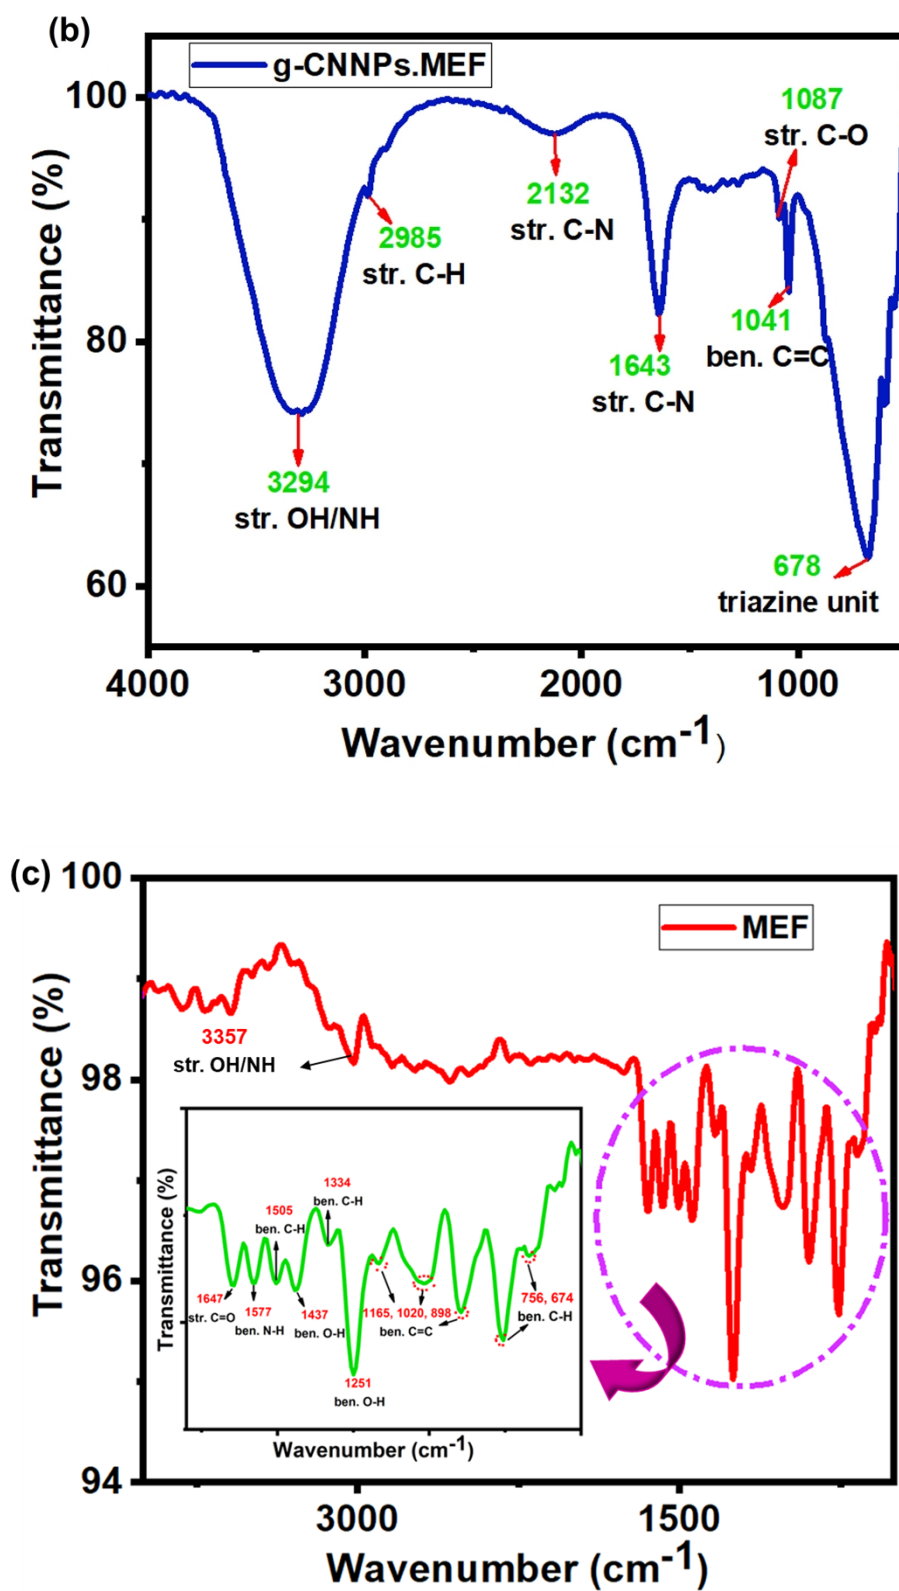

**Figure S11.** FT-IR spectra of g-CNNPs (a), g-CNNPs•MEF (b), and MEF (c).

**Table S4.** FT-IR spectrum of MEF identification.

| Sl. No | Functional groups | Mode of vibration | Observed frequency (cm <sup>-1</sup> ) |
|--------|-------------------|-------------------|----------------------------------------|
| 1      | OH/NH             | stretching        | ~3357                                  |
| 2      | C=O               | stretching        | ~1647                                  |
| 3      | N-H               | bending           | ~1577                                  |
| 4      | C-H               | bending           | ~1505, ~1334, ~756, ~674               |
| 5      | O-H               | bending           | ~1437, ~1251                           |
| 6      | C=C               | bending           | ~1165, ~1020, ~898                     |

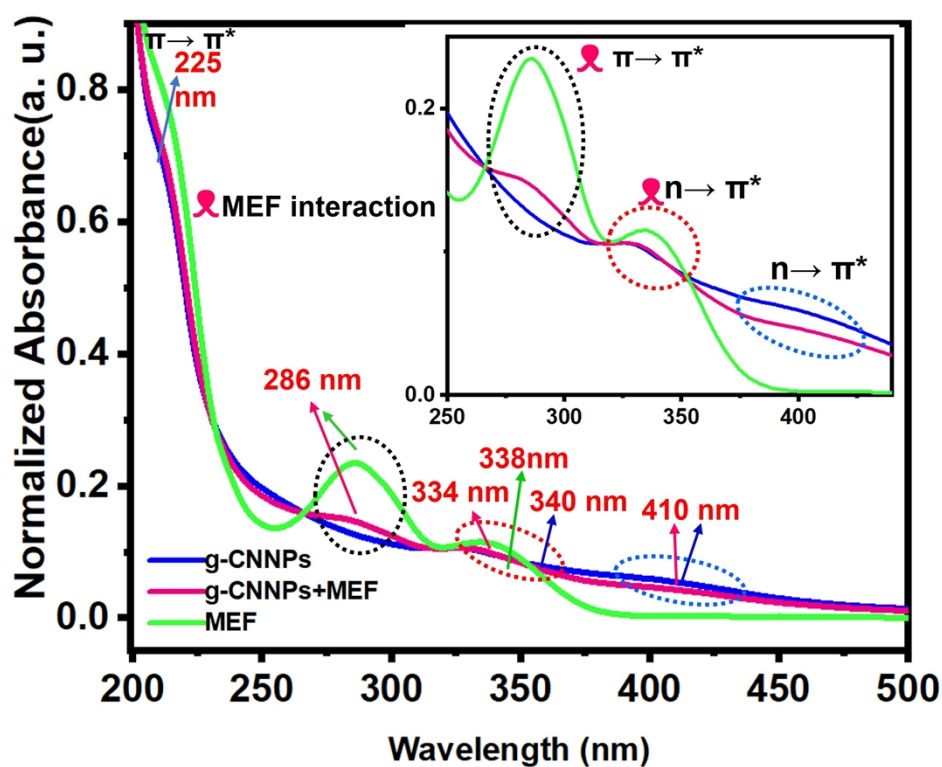

**Figure S12.** The Normalized UV-Vis spectra of isolated g-CNNPs, MEF, and g-CNNPs•MEF.

### Contact angle analysis:

To measure the contact angle, a g-CNNPs pellet was prepared by compressing a known amount of powder into a circular disc shape. Placed the resulting pellet on a flat surface and ensure it is securely fixed. Dispense a small droplet of the test water onto the surface of the pellet using a micro-syringe. Capture an image of the droplet on the pellet surface using a contact angle goniometer. The contact angle was measured by analyzing the captured images typically using software that calculates the angle between the droplet and the pellet surface.

**Table S5.** Comparison of MEF detection by various materials and techniques reported so far.

| Sl. No | Material                                    | Linier Range               | LoD                  | Sensing Method  | Real Sample Analysis                        | References |
|--------|---------------------------------------------|----------------------------|----------------------|-----------------|---------------------------------------------|------------|
| 1      | CV/CPE                                      | 0.01 to 470 $\mu\text{M}$  | 0.0023 $\mu\text{M}$ | electrochemical | human blood, and pharmaceutical samples     | [13]       |
| 2      | SWCNTs/GCE                                  | 0.1 to 35 $\mu\text{M}$    | 14.3 nM              | electrochemical | human urine                                 | [33]       |
| 3      | NiO-SWCNTs/DDPM/CPE                         | 1.0 to 600 $\mu\text{M}$   | 0.5 $\mu\text{M}$    | electrochemical | tablet, injection, and pharmaceutical serum | [34]       |
| 4      | CVO/RGO/GCE                                 | 0.001-to 425 $\mu\text{M}$ | 0.0079 $\mu\text{M}$ | electrochemical | human blood serum and urine                 | [35]       |
| 5      | FCDs@SiO <sub>2</sub> -TPA                  | 1.0 to 8 $\mu\text{M}$     | 197 nM               | fluorescence    | water, and cow urine                        | [36]       |
| 6      | DMO/CNF/GCE                                 | 0.01 to 741 $\mu\text{M}$  | 0.009 $\mu\text{M}$  | electrochemical | human blood and tablet                      | [37]       |
| 7      | mpg-C <sub>3</sub> N <sub>4</sub> /PANI/CdO | 0.2 to 400 $\mu\text{M}$   | 0.045 $\mu\text{M}$  | electrochemical | human serum                                 | [38]       |

|    |                                                 |                 |        |                 |                                                                     |           |
|----|-------------------------------------------------|-----------------|--------|-----------------|---------------------------------------------------------------------|-----------|
| 8  | Co <sub>3</sub> O <sub>4</sub> NPs              | 1 to 500<br>μM  | 0.3 μM | electrochemical | -                                                                   | [39]      |
| 9  | Zn-Fe <sub>2</sub> O <sub>4</sub> @<br>Ni-AILDH | 50 to 100<br>nM | 6.3 nM | electrochemical | tablet, human<br>plasma, urine, and<br>pharmaceutical<br>wastewater | [40]      |
| 10 | g-CNNPs                                         | 10 to 100<br>nM | 3.4 nM | fluorescence    | humane urine                                                        | This Work |
